# Supplementary material for: Environmental impact of direct lithium extraction from brines
Source: Springer Nature journal article supplement (doi:10.1038/s43017-022-00387-5), 2023-02-23
Supplement: 43017_2022_387_MOESM1_ESM.pdf [file 43017_2022_387_MOESM1_ESM.pdf]

---

# Environmental impact of direct lithium extraction from brines

---

In the format provided by the authors and unedited

---

# ***SUPPORTING INFORMATION***

***for***

## **Environmental impact of direct lithium extraction from brines**

María L. Vera<sup>1</sup>, Walter R. Torres<sup>1</sup>, Claudia I. Galli<sup>2</sup>, Alexandre Chagnes<sup>3</sup>, Victoria Flexer<sup>1,\*</sup>

<sup>1</sup>CIDMEJu (CONICET-Universidad Nacional de Jujuy), Jujuy, Argentina.

<sup>2</sup>CEGA-INSUGEO (CONICET-Universidad Nacional de Salta), Salta, Argentina

<sup>3</sup>CNRS, GeoRessources, Université de Lorraine, 54000 Nancy, France

§ These authors contributed equally to this work

\*Corresponding author: [vflexer@unju.edu.ar](mailto:vflexer@unju.edu.ar)

| Deposit (country)                        | Ca <sup>2+</sup>  | Mg <sup>2+</sup> | Na <sup>+</sup> | K <sup>+</sup> | Li <sup>+</sup> | Cl <sup>-</sup> | SO <sub>4</sub> <sup>2-</sup> | B    | TDS                 | References   |
|------------------------------------------|-------------------|------------------|-----------------|----------------|-----------------|-----------------|-------------------------------|------|---------------------|--------------|
|                                          | g L <sup>-1</sup> |                  |                 |                |                 |                 |                               |      |                     |              |
| Uyuni (Bolivia)                          | 0.46              | 7.68             | 98.40           | 7.92           | 0.32            | 177.6           | 12.96                         | 0.19 | 305.5               | <sup>1</sup> |
| Atacama (Chile)                          | 0.45              | 9.65             | 91.0            | 23.6           | 1.57            | 189.5           | 15.9                          | 0.44 | 332.3 <sup>A</sup>  | <sup>1</sup> |
| Olaroz (Argentina)                       | 1.10              | 2.00             | 111.50          | 5.30           | 0.57            | 177.50          | 9.80                          | NR   | 309.20 <sup>B</sup> | <sup>2</sup> |
| Hombre Muerto (Argentina)                | 0.12              | 0.14             | 103.00          | 9.70           | 0.90            | 168.00          | 11.40                         | 0.54 | 294.00              | <sup>1</sup> |
| Zabuye Lake (China)                      | 0.00              | 0.00             | 127.90          | 45.96          | 0.66            | 147.6           | 26.29                         | 1.58 | 434.47              | <sup>1</sup> |
| Clayton Valley (USA)                     | 0.45              | 0.23             | 63.70           | 8.00           | 0.36            | 100.00          | 6.60                          | 0.09 | 180.10              | <sup>1</sup> |
| Taijinar Salt Lake brine (China)         | 0.30              | 13.50            | 102.30          | NR             | 0.21            | 188.10          | 24.00                         | 0.31 | 328.70 <sup>C</sup> | <sup>3</sup> |
| Southern Tibet geothermal (China)        | 0.05              | 0.02             | 1.70            | NR             | 0.13            | 2.00            | 1.70                          | ND   | 212.00              | <sup>3</sup> |
| Chott Djerid (Tunisia)                   | 1.60              | 3.40             | 80.00           | 5.60           | 0.06            | 144.10          | 6.70                          | NR   | 400.00              | <sup>4</sup> |
| Cerro prieto (USA)                       | 30.80             | 3.20             | 60.00           | 23.50          | 0.25            | 175.50          | 46.00                         | 0.50 | 339.70 <sup>C</sup> | <sup>1</sup> |
| Salton Sea (USA)                         | 25.70             | 0.11             | 49.20           | 14.50          | 0.20            | 142.00          | 0.10                          | 0.30 | 236.00              | <sup>5</sup> |
| Rincon (Argentina)                       | 0.60              | 3.00             | 97.90           | 6.60           | 0.30            | 158.00          | 0.00                          | 0.40 | 266.80              | <sup>1</sup> |
| Soultz-sous-Forêts (France)              | 7.20              | 0.13             | 28.10           | 3.20           | 0.17            | 58.60           | 0.16                          | 0.04 | 99.0                | <sup>6</sup> |
| Buhl geothermal well (Germany)           | 11.60             | 1.93             | 64.00           | 0.49           | 0.04            | 120.30          | 1.60                          | 0.00 | 201.00              | <sup>6</sup> |
| Landau geothermal well (Germany)         | 7.70              | 0.08             | 28.20           | 4.00           | 0.18            | 64.20           | 0.10                          | 0.00 | 106.00              | <sup>6</sup> |
| Dieng geothermal power plant (Indonesia) | 0.40              | 0.003            | 0.039           | 2.20           | 0.04            | 13.60           | 0.003                         | 0.30 | 23.70               | <sup>7</sup> |
| Coipasa (Bolivia)                        | 0.16              | 13.60            | 75.10           | 11.00          | 0.35            | 151.00          | 24.60                         | 0.80 | 323.30              | <sup>8</sup> |
| Cauchari (Argentina)                     | 0.30              | 1.45             | 93.30           | 4.20           | 0.51            | 148.60          | 15.70                         | 1.10 | 265.90              | <sup>8</sup> |

**Supplementary Table 1:** Composition of selected lithium rich brines. <sup>A</sup>: TDS as reported in the reference. Value not in agreement with the addition of reported concentrations. <sup>B</sup> all values correspond to the average of 4 samples from the same reference. Selected samples correspond to same depths, pH, and sampling date (Oct 2016). <sup>C</sup>: TDS not reported in cited reference. Value listed here correspond to addition of reported concentrations.

| Technique   | Novelty                                                                                      | Brine                                     | Cycling test | Efficiency                                                                                                                         | [Mg]/[Li](0) | [Mg]/[Li](f) | [Na]/[Li](0) | [Na]/[Li](f) | Li <sup>+</sup> recovery                                                                   | Estimation of energy or water consumption - Analysis of scalability - Circular production                              | Ref |
|-------------|----------------------------------------------------------------------------------------------|-------------------------------------------|--------------|------------------------------------------------------------------------------------------------------------------------------------|--------------|--------------|--------------|--------------|--------------------------------------------------------------------------------------------|------------------------------------------------------------------------------------------------------------------------|-----|
| Ion pumping | Improve electrode performance                                                                | Simulated                                 | 5            | Reported as ion exchange capacity= 35.2 mg/g                                                                                       | NR           | NR           | 1            | 0.02         | 29%                                                                                        | NR                                                                                                                     | 9   |
| Ion pumping | Improve energy consumption                                                                   | Simulated                                 | 30           | Reported as ion exchange capacity= 34.8mg/g                                                                                        | NR           | NR           | NR           | NR           | NR                                                                                         | Distilled water is used for washing step                                                                               | 10  |
| Ion pumping | A compressive study on the competitive effect of other ions on lithium adsorption            | Simulated                                 | 50           | Reported as ion exchange capacity= 13.88 mg/g                                                                                      | 1            | 0.008        | 1            | 0.03         | 20%                                                                                        | Distilled water is used for washing step                                                                               | 11  |
| Ion pumping | MOFs is tested as a new ION PUMPING film for Li uptake from dilute solutions                 | Simulated                                 | NR           | Reported as ion exchange capacity= 37.55 mg/g                                                                                      | 1            | 0.006        | 1            | 0.01         | NR                                                                                         | NR                                                                                                                     | 12  |
| Ion pumping | Self-electrical energy recuperation (almost the system is not self-sufficiency)              | Simulated                                 | 100          | Reported as Li <sup>+</sup> uptake capacity = 10.88 mg/g                                                                           | NR           | NR           | 50           | 0.01         | 44%                                                                                        | Reported energy consumption= 1.007 Wh/mol.                                                                             | 13  |
| Ion pumping | N-doping carbon encapsulated LMO film electrode for efficient Li electrosorption             | Simulated                                 | 10           | Reported as Li <sup>+</sup> uptake capacity = 37.14 mg/g. With a charge capacity of 79.58% and discharge of 82.38% after 50 cycles | 3.75         | NR           | 36.72        | NR           | NR                                                                                         | NR                                                                                                                     | 14  |
| Ion pumping | An electrochemical flow reactor for the extraction of LiCl was designed and tested (part II) | Real brine from Olaroz, Argentina         | NR           | Extraction efficiencies achieved up to 36 mg/g                                                                                     | 0.65         | NR           | 27.94        | NR           | NR                                                                                         | For washing, 2.5- 3L of fresh water is needed for 0.03L of brine                                                       | 15  |
| Ion pumping | A flow-by sustainable electrochemical reactor was assessed for extraction of Li from brine   | Real brine, from Hombre Muerto, Argentina | NR           | Maximum extraction capacity= 38.2mg/g                                                                                              | 0.66         | NR           | 26.08        | NR           | 4.9% (limited by the mass of the Li <sub>1-x</sub> Mn <sub>2</sub> O <sub>4</sub> cathode) | Current efficiency= 85%. Specific energy consumption= 2.16 Wh/mol Li. 1L of fresh water is needed for each 1L of brine | 16  |
| Ion pumping | Redox-mediated lithium recovery system is                                                    | Simulated                                 | NR           | Li uptake capacity= 3.1 mg/g                                                                                                       | 1.82         | 0.25         | 15.3         | 14.22        | NR                                                                                         | 1.05L of fresh water is needed for each 1L of brine. Charge                                                            | 17  |

|                        |                                                                                                                        |                                   |        |                                                                                             |                    |                   |      |        |                                                   |                                                                                                                                                                                                                                 |    |
|------------------------|------------------------------------------------------------------------------------------------------------------------|-----------------------------------|--------|---------------------------------------------------------------------------------------------|--------------------|-------------------|------|--------|---------------------------------------------------|---------------------------------------------------------------------------------------------------------------------------------------------------------------------------------------------------------------------------------|----|
|                        | proposed for continuous lithium recovery                                                                               |                                   |        |                                                                                             |                    |                   |      |        |                                                   | efficiencies of approximately 83–100%, and energy consumption of 133–141 kJ/mol                                                                                                                                                 |    |
| <b>Ion pumping</b>     | A fast, energy-saving, and environment-friendly process is proposed                                                    | Simulated                         | 20     | Reported as the LiCl production rates= 50–60 mmol Li/m <sup>2</sup> h                       | 0.42               | 0.01              | 20   | 0.04   | Final Li concentration= 23.3mM with a purity= 95% | Average freshwater production rate can reach around 12.6 kg/m <sup>2</sup> h. Average energy consumption= 4.83 Wh/mol Li. Current efficiency >90%                                                                               | 18 |
| <b>Electromembrane</b> | A new liquid carrier with high Li <sup>+</sup> selectivity for an ED process                                           | West Taijinair salt lake brine    | NR     | A reduction equal to 99.5% is reached for Mg/Li ratio                                       | 3.09               | 0.054             | 0.14 | 0.136  | NR                                                | Current efficiency= 65%. Specific energy consumption= 16 Wh/g                                                                                                                                                                   | 19 |
| <b>Electromembrane</b> | A new methodology for greatly reduce the Na/Li ratio from real brines precipitating a pure Na salt                     | Real, from the north of Argentina | 3000 h | Coulombic efficiency= 95%                                                                   | 0                  | 0                 | NR   | NR     | NR                                                | Energy consumption= 331.3 kWh for the lowest I applied. High purity by-product and desalinated water are obtained                                                                                                               | 20 |
| <b>Electromembrane</b> | Membrane electrolysis is used for the removal of Ca <sup>+2</sup> and Mg <sup>+2</sup> from brines                     | Real, from the north of Argentina | 500 h  | Coulombic efficiency= 95.5%                                                                 | 6.96/ 13.03/ 19.7  | 0                 | NA   | NA     | 100%                                              | 62 kWh.m <sup>-3</sup> for brine with 3090 ppm of Mg <sup>2+</sup> . High purity by-products are obtained. No waste is generated                                                                                                | 21 |
| <b>Electromembrane</b> | An EM process is proposed as a new technology to crystallize Li <sub>2</sub> CO <sub>3</sub> without water evaporation | Simulated                         | 300 h  | Coulombic efficiency= 99.7%. Purity of obtained Li <sub>2</sub> CO <sub>3</sub> = 97.5%     | NA                 | NA                | 1.2  | 0.0004 | 90%                                               | Energy consumption= 70.6 kWh.m <sup>-3</sup> . Low salinity water is recovered                                                                                                                                                  | 22 |
| <b>Electromembrane</b> | Prototype of a solar-powered electrodialyser                                                                           | Seawater                          | NR     | NR                                                                                          | NR                 | NR                | NR   | NR     | NR                                                | For lithium release a washing step is needed                                                                                                                                                                                    | 23 |
| <b>Electromembrane</b> | Propose a clean production process for the utilization of concentrated seawater/salt lake brine                        | Seawater concentrate              | NR     | Reductions equal to 88.9%; 83.2% and 76.7% are reached for Mg/Li ratio for different brines | 35.18/ 54.3/ 72.72 | 3.91/ 9.13/ 16.97 | NR   | NR     | 76.5%                                             | Optimal condition for Tajinar Brine: 0.66 kWh/(mol Li). Circular production schematized, target product: Li <sub>2</sub> CO <sub>3</sub> , by products will be NaCl, KCl, MgCl <sub>2</sub> and Mg <sub>2</sub> SO <sub>4</sub> | 24 |
| <b>Electromembrane</b> | A study on Li <sup>+</sup> /Mg <sup>2+</sup> separation performance                                                    | Simulated                         | NR     | Mg/Li ratio decreased 21.8 times                                                            | 43.81              | ≤5                | NR   | NR     | 90%                                               | Reported energy consumption= 0.0019 KWh/gL, at 5.9 A/m <sup>2</sup>                                                                                                                                                             | 25 |
|                        |                                                                                                                        |                                   |        |                                                                                             | 17                 | 2                 | NR   | NR     |                                                   |                                                                                                                                                                                                                                 |    |

|                             |                                                                                                                          |                          |    |                                                                                                                                                                   |    |      |      |      |        |                                                                          |    |
|-----------------------------|--------------------------------------------------------------------------------------------------------------------------|--------------------------|----|-------------------------------------------------------------------------------------------------------------------------------------------------------------------|----|------|------|------|--------|--------------------------------------------------------------------------|----|
| <b>Electromembrane</b>      | An study on Li <sup>+</sup> /Mg <sup>2+</sup> separation performance for simulated real brines by a selective ED process | Simulated                | NR | Li <sup>+</sup> is concentrated by a factor of 1.4 with a reduction equal to 88.3% on Mg/Li ratio                                                                 | NR | NR   | NR   | NR   | 72.4%  | At optimal voltage of 5 V, reported current efficient= 8.68%             | 26 |
| <b>Electromembrane</b>      | Simultaneously recovery of lithium and boron                                                                             | Single or binary mixture | NR | 99.6% for Li separation and 72.3% for boron                                                                                                                       | NR | NR   | NR   | NR   | 83.6%  | NR                                                                       | 27 |
| <b>Electromembrane</b>      | Reduction of heat requirements to obtain LiOH from brines with high LiCl concentration                                   | Simulated                | NR | Produced LiOH with a purity between 96.0–95.4%                                                                                                                    | NR | NR   | NR   | NR   | NR     | Specific electricity consumption: 7.57 and 9.45 kWh per kilogram of LiOH | 28 |
| <b>Electromembrane</b>      | A novel method based on electro-electrodialysis to produce LiOH                                                          | Single or Binary mixture | NR | Li <sup>+</sup> is concentrated by a factor of 3.9 times and LiOH is produced with a purity of 95.3%                                                              | NR | NR   | NR   | NR   | NR     | \$USD 2.56/ Kg LiOH                                                      | 29 |
| <b>Electromembrane</b>      | S-ED is employed to desorb lithium from LMO sieves, instead of acid treatment                                            | Simulated                | NR | Desorption time is reduced by 180 minutes compared to conventional treatment                                                                                      | NR | NR   | NR   | NR   | 70%    | NR                                                                       | 30 |
| <b>Electromembrane</b>      | Focus on competitive effect of K <sup>+</sup> and Na <sup>+</sup> respect to Li <sup>+</sup> migration                   | Simulated                | NR | The efficiency of Mg-Li separation decreases by 79% with increasing Na <sup>+</sup> /Li <sup>+</sup> and by 74.4% with increasing K <sup>+</sup> /Li <sup>+</sup> | NR | NR   | NR   | NR   | 67.6%  | Energy consumption at optimized voltage (6V): 0.17 – 0.23 KWh/mol Li     | 31 |
| <b>Electromembrane</b>      | An ED process is validated with real brine. Focus is on improvement of efficiency and reduce energy cost                 | Real brine               | NR | A reduction of 90% on Mg/Li ratio                                                                                                                                 | 20 | 2.07 | 0.36 | 0.56 | 90.5%  | Reported energy consumption 0.0045 KwH/g Li (20 V)                       | 32 |
| <b>Electromembrane</b>      | Two different ED stacks were compared for separation of B and Li simultaneously                                          | Single or Binary mixture | NR | 62-69% for B removal and 93% for Li removal from feed solution                                                                                                    | NR | NR   | NR   | NR   | 60-70% | NR                                                                       | 33 |
| <b>Membrane development</b> | A new synthesis strategy to obtain a selective membrane with enhance properties                                          | Single or Binary mixture | 4  | Reported as Li <sup>+</sup> uptake capacity= 50.87 mg/g; 43.94 mg/g after 4 cycles                                                                                | NR | NR   | NR   | NR   | NR     | NR                                                                       | 34 |
| <b>Membrane development</b> | Synthesis of an ion imprinted membrane with enhanced hydrophilicity and stability                                        | Single or Binary mixture | 10 | Reported as Li <sup>+</sup> uptake capacity= 21.55 mg/g                                                                                                           | NR | NR   | NR   | NR   | 70%    | NR                                                                       | 35 |

|                                     |                                                                                                         |                          |                             |                                                                                                                              |                    |                   |              |                 |       |    |                                                                                                                                                               |    |
|-------------------------------------|---------------------------------------------------------------------------------------------------------|--------------------------|-----------------------------|------------------------------------------------------------------------------------------------------------------------------|--------------------|-------------------|--------------|-----------------|-------|----|---------------------------------------------------------------------------------------------------------------------------------------------------------------|----|
| <b>Electromembrane -Ion pumping</b> | Monovalent cation exchange membrane integrated with MCDI system to enhance the separation of Li from Mg | Single or Binary mixture | NR                          | 38.4% for Li removal and 19.2% for Mg removal in large module                                                                | 1                  | 0.39              | NR           | NR              | NR    | NR | Energy consumption of large module= 0.0018 kWh mol <sup>-1</sup> . Freshwater is used for Li recovery                                                         | 36 |
| <b>Electromembrane -Ion pumping</b> | LMO is employed as electrode for MCD system, improving adsorption capacity                              | Single or Binary mixture | 5                           | NR                                                                                                                           | NR                 | NR                | NR           | NR              | NR    | NR | Freshwater is used for washing and desorption steps                                                                                                           | 37 |
| <b>Electromembrane -Ion pumping</b> | An electro-enhanced lithium ion recovery system is proposed                                             | Simulated                | 5                           | NR                                                                                                                           | 0.1/ 1             | 0.057/ 0.1        | 0.1/ 1/ 48.6 | 0.27/ 0.04/ 4.6 | NR    | NR | Energy consumption: Wads and Wdes were 4.4 Wh/g-Li and 23.3 Wh/g-Li. Freshwater used for washing and desorption steps.                                        | 38 |
| <b>Electromembrane -Ion pumping</b> | LMO is coated with a thin film of carbon to improve material capacity and process time                  | Single or Binary mixture | 8                           | Reported as electrode capacity for Li uptake= 61%                                                                            | NR                 | NR                | NR           | NR              | NR    | NR | Freshwater used for washing and desorption steps                                                                                                              | 39 |
| <b>Nanofiltration</b>               | A higher separation factor for LiCl/MgCl <sub>2</sub> was gotten after membrane modification with EDTA  | Simulated                | 8                           | A reduction of 89.1% is reached for Mg/Li ratio                                                                              | 6.8                | 0.74              | NR           | NR              | NR    | NR | NR                                                                                                                                                            | 40 |
| <b>Nanofiltration</b>               | Evaluation of NF process over different operational parameters                                          | Simulated                | NR                          | A reduction of 99.2% is reached for Mg/Li ratio; negatively affected by monovalent cations and negatively by divalent ones   | 9.91               | 0.031             | NR           | NR              | 95%   | NR | NR                                                                                                                                                            | 41 |
| <b>Nanofiltration</b>               | Exceedingly high permselectivity                                                                        | Single or Binary mixture | NR                          | Reported as Mg-Li separation factor= 71; decreases to 47 with increasing TDS of feed solution. Na-Li separation is deficient | 5.57/ 14.44/ 17.17 | 0.079/ 0.18/ 0.23 | NR           | NR              | NR    | NR | NR                                                                                                                                                            | 42 |
| <b>Nanofiltration</b>               | High Li rejection due to the coupling strategy, NF + reverse electric field                             | Single or Binary mixture | A long experiment for 168 h | Reported as Li <sup>+</sup> rejection of 97.01%                                                                              | NR                 | NR                | NR           | NR              | 92.5% | NR | The energy consumption of the RENF process only has a 0.17% increase as compared with the NF process, an order of magnitude lower than that of the RO process | 43 |

|                                               |                                                                                                                                    |                                            |                             |                                                                                                                                                                      |       |       |      |    |       |                                                                                                                                                                                            |    |
|-----------------------------------------------|------------------------------------------------------------------------------------------------------------------------------------|--------------------------------------------|-----------------------------|----------------------------------------------------------------------------------------------------------------------------------------------------------------------|-------|-------|------|----|-------|--------------------------------------------------------------------------------------------------------------------------------------------------------------------------------------------|----|
| <b>Nanofiltration</b>                         | Different polymers were studied to enhance Li recovery                                                                             | Single or Binary mixture                   | 4                           | Reported as Li removal efficiency= 80%; decreases to 40% with the addition of for Na <sup>+</sup> or K <sup>+</sup> and to 20% with the addition of Mg <sup>2+</sup> | NR    | NR    | NR   | NR | NR    | A washing step is needed for Li recovery                                                                                                                                                   | 44 |
| <b>Nanofiltration</b>                         | Enhancement in salt permeation and selectivity by NF membrane functionalization                                                    | Single or Binary mixture                   | A long experiment for 192 h | A reduction of 97.5% is reached for Mg/Li ratio                                                                                                                      | 20.82 | 0.53  | NR   | NR | NR    | NR                                                                                                                                                                                         | 45 |
| <b>Membrane distillation + Nanofiltration</b> | An hybrid system for lithium concentration                                                                                         | Simulated                                  | NR                          | Li+ is concentrated by a factor of 12                                                                                                                                | 0.28  | 0.014 | NR   | NR | NR    | The membrane process represents about 14% of the capital cost of solar evaporation. On the other hand, the operating costs are higher due to thermal energy and membrane replacement costs | 46 |
| <b>Nanofiltration + electromembrane</b>       | Combine: NF (to separate magnesium from salt lake brine) + RO-CED ( to enrich NF permeates) + BMED ( to produce Lithium hydroxide) | North-Western of Qinghai province, China   | NR                          | LiOH·H <sub>2</sub> O is produced with a purity of 99.6% was produced                                                                                                | 0.06  | 0.001 | NR   | NR | 92%   | Under optimized conditions, current efficiency and energy consumption were 36.05% and 6.20 kWh/kg LiOH, respectively. Employs freshwater for BMED test                                     | 47 |
| <b>Ion exchange resins</b>                    | A superior Li <sup>+</sup> adsorption is reached                                                                                   | Simulated                                  | 6                           | Reported as ion adsorption capacity= 59.1 mg/g                                                                                                                       | NR    | NR    | NR   | NR | NR    | 0.76 L of fresh water is needed for each 1 L of brine                                                                                                                                      | 48 |
| <b>Ion exchange resins</b>                    | The process of Li <sup>+</sup> uptake from a real brine is studied                                                                 | Real, Qinghai West Taijinar Salt Lake      | 5                           | Reported as ion adsorption capacity= 19.22 mg/g                                                                                                                      | NR    | NR    | NR   | NR | NR    | 1.04 L of fresh water is needed for each 1 L of brine                                                                                                                                      | 49 |
| <b>Ion exchange resins</b>                    | Synthesis of an aluminium-doped ion-sieve with enhanced adsorption performance                                                     | Single or Binary mixture                   | 4                           | Reported as ion adsorption capacity= 32.6 mg/g                                                                                                                       | NA    | NA    | NA   | NA | 37.6% | 2.5 L of fresh water is needed for each 1 L of brine                                                                                                                                       | 50 |
| <b>Ion exchange resins</b>                    | Porous fiber-supported HTO was prepared to improve Li recovery                                                                     | Real, from a Geothermal Power Plant, Tibet | 6                           | Reported as ion adsorption capacity= 24.67 mg/g                                                                                                                      | NR    | NR    | 7.94 | NR | 96.6% | 0.1L of fresh water is needed for each 1 L of brine                                                                                                                                        | 51 |
| <b>Ion exchange resins</b>                    | Spherical PVB-HTO composites having excellent Li extraction                                                                        | Simulated                                  | 15                          | Reported as ion adsorption capacity= 12 mg/g                                                                                                                         | 1     | 0     | 1    | 0  | 85.5% | 1L of fresh water is needed for each 1 L of brine                                                                                                                                          | 52 |



|                                |                                                                                                |                                          |    |                                                                                                   |       |      |       |       |        |                                                           |    |
|--------------------------------|------------------------------------------------------------------------------------------------|------------------------------------------|----|---------------------------------------------------------------------------------------------------|-------|------|-------|-------|--------|-----------------------------------------------------------|----|
|                                | performance were synthesized                                                                   |                                          |    |                                                                                                   |       |      |       |       |        |                                                           |    |
| <b>Ion exchange resins</b>     | A novel hierarchical cubic $\text{Li}_x\text{TiO}_2$ -based hollow Li-ion sieve is constructed | Real brine, from Qinghai Province, China | 5  | Reported as ion adsorption capacity=6.9 mg/g                                                      | 56    | NR   | NR    | NR    | NR     | NR                                                        | 53 |
| <b>Ion exchange resins</b>     | $\alpha\text{-Al}_2\text{O}_3$ supported membranes are prepared for Li extraction              | Single or Binary mixture                 | 5  | Reported as ion adsorption capacity=9.74 mg/g                                                     | NA    | NA   | NA    | NA    | 38.6%  | 0.62L of fresh water is needed for each 1 L of brine      | 54 |
| <b>Ion exchange resins</b>     | A novel lithium-ion sieve is synthesized                                                       | Real brine from Qaidam Basin             | 4  | Reported as ion adsorption capacity=13.32 mg/g                                                    | 225   | 15   | 145   | 25    | 99.98% | 1.4L of fresh water is needed for each 1 L of brine       | 55 |
| <b>Ion exchange resins</b>     | A Cr-Doped Lithium Ion Sieve is synthesized and characterized                                  | Real brine                               | 20 | Reported as ion adsorption capacity=28.35 mg/g                                                    | 135.7 | NR   | 6.78  | NR    | 81.7%  | 0.3L of fresh water is needed for each 1 L of brine       | 56 |
| <b>Ion exchange resins</b>     | A $\text{Fe}_3\text{O}_4$ -doped magnetic lithium ion-sieve is prepared for Li extraction      | Simulated                                | 5  | Reported as ion adsorption capacity=29.33 mg/g                                                    | NA    | NA   | NA    | NA    | NR     | 0.07L of fresh water is needed for each 1 L of brine      | 57 |
| <b>Ion exchange resins</b>     | Different $\text{TiO}_2$ precursors are employed to control the ion sieve wettability          | Simulated                                | 8  | Reported as ion adsorption capacity=30.11 mg/g                                                    | NA    | NA   | 0.3   | 0.003 | NR     | 0.1L of fresh water is needed for each 1 L of brine       | 58 |
| <b>Ion exchange resins</b>     | A novel composite lithium ion-sieve is synthesized and proved                                  | Geothermal water from Tibet              | 5  | Reported as ion adsorption capacity=11.35 mg/g                                                    | NA    | NA   | 7.94  | NR    | 79.13% | 0.01L of fresh water is needed for each 1 L of brine      | 59 |
| <b>Ion exchange resins</b>     | A superior lithium adsorption capacity is reached                                              | Simulated                                | 20 | Reported as ion adsorption capacity=15.5 mg/g                                                     | 0.2   | 0    | 0.097 | 0     | NR     | NR                                                        | 60 |
| <b>Ion exchange resins</b>     | A novel synthetic method is employed to improve Li recovery                                    | Geothermal water from Tibet              | 4  | Reported as ion adsorption capacity=11.4 mg/g                                                     | NA    | NA   | 0.21  | 0     | 88.42% | 0.2L of fresh water is needed for each 1 L of brine       | 61 |
| <b>Selective precipitation</b> | A new precipitation method is proposed to extract Li from salt lake brines                     | Real brine from West Taijinar            | NR | A reduction of 98.5% is reached for Mg/Li ratio                                                   | 14.04 | 0.05 | NR    | NR    | 93.2%  | Precipitating reagents can be recycled                    | 62 |
| <b>Selective precipitation</b> | Significant reduction of precipitation temperature by using seed induction process             | Simulated                                | NR | $\text{Li}_3\text{PO}_4$ is obtained with a purity of 99.15%.                                     | NR    | NR   | NR    | NR    | 84%.   | Freshwater for wash the obtained $\text{Li}_3\text{PO}_4$ | 63 |
| <b>Selective precipitation</b> | High $\text{Li}^+$ enrichment from a complex brine, Dead Sea                                   | Real brine from Dead sea                 | NR | Lithium enrichment from 30–40 mg/L in the EB to 1000–1700 mg/kg in the obtained solid precipitate | NR    | NR   | NR    | NR    | 40%    | Fresh water for washing step                              | 64 |

|                                                          |                                                                                                              |                                                                     |                                                  |                                                                                                    |        |            |        |              |                         |                                                                                                   |    |
|----------------------------------------------------------|--------------------------------------------------------------------------------------------------------------|---------------------------------------------------------------------|--------------------------------------------------|----------------------------------------------------------------------------------------------------|--------|------------|--------|--------------|-------------------------|---------------------------------------------------------------------------------------------------|----|
| <b>Selective precipitation</b>                           | Enhance divalent separation and Li recovery as Li <sub>2</sub> CO <sub>3</sub> by a co-precipitation process | Industrial refined brine from Albemarle industrial plant “La Negra” | NR                                               | Li <sub>2</sub> CO <sub>3</sub> with Mg concentrations from 1% to 3% was obtained with yields >85% | 0.35   | 0.16       | NR     | NR           | NR                      | Employs hot water, for wash                                                                       | 65 |
| <b>Selective precipitation</b>                           | A closed loop process is proposed to prepare Li <sub>2</sub> CO <sub>3</sub> battery grade                   | Arizzaro Salt Lake, Argentina                                       | A long experiment for 24 h                       | Almost 90% for each step                                                                           | 0.93   | 0          | 11.37  | 0            | 74.9%                   | Cost estimation= 1700 \$/ton(Li <sub>2</sub> CO <sub>3</sub> ); employs freshwater for anolyte    | 66 |
| <b>Liquid-liquid extraction</b>                          | Li was recovered by centrifugal extraction                                                                   | Simulated                                                           | NR                                               | NR                                                                                                 | NR     | NR         | NR     | NR           | NR                      | No freshwater needed                                                                              | 67 |
| <b>Ion pumping</b>                                       | A novel redox reagent is employed for fast lithium sequestration reactions                                   | Simulated                                                           | NR                                               | Reported as Li uptake capacity of host material= 45 mg/g                                           | 5/ 6.5 | 0.01/ 0.01 | 77/ 15 | 0.006/ 0.002 | NR                      | NR                                                                                                | 68 |
| <b>Ion pumping</b>                                       | A chemical redox method to direct lithium extraction                                                         | Simulated                                                           | 5                                                | Absorption 90%, desorption 90%.                                                                    | 73.71  | 0.007      | 248.61 | 0.48         | 91.11%                  | NR                                                                                                | 69 |
| <b>Ion pumping</b>                                       | Improve the cell design in order to solve the problem of mass transfer in diluted lithium solutions          | Simulated                                                           | 9; (200 were simulated for an optimal long test) | 60%                                                                                                | NR     | NR         | NR     | NR           | 37%                     | 6.1 Wh/mol, 30% pumping; 5ml freshwater/1.35L brine; No circular production                       | 70 |
| <b>Ion pumping</b>                                       | A pilot scale demonstration                                                                                  | Seawater concentrate                                                | NR                                               | An enrichment in Li concentration of 1800 times                                                    | 2028   | 0.048      | 18000  | 0.04         | NR                      | A 1m <sup>3</sup> tank is proposed at pilot scale for the distilled water needed for the process. | 71 |
| <b>Immobilized solvent for Li<sup>+</sup> extraction</b> | Focus on Na/Li ratio, from a composite lithium membrane                                                      | Single or Binary mixture                                            | 5                                                | NR                                                                                                 | NR     | NR         | NR     | NR           | 22.1%, after 27 days    | Freshwater for membrane rinse.                                                                    | 72 |
| <b>Electrocoagulation</b>                                | An alternative for chemical precipitation                                                                    | Single or Binary mixture                                            | NR                                               | 95%                                                                                                | NR     | NR         | NR     | NR           | 95%, by continuous mode | Operating cost per gram of Li= 0.023 US\$                                                         | 73 |
| <b>Liquid-liquid extraction</b>                          | Enhancement in Li <sup>+</sup> stripping with HCl                                                            | Single or Binary mixture                                            | 6                                                | 70%                                                                                                | 40     | 1.79       | NR     | NR           | 63%                     | Water consumption = 3/10 of brine volume                                                          | 74 |
| <b>Liquid-liquid extraction</b>                          | A novel ionic liquid as co-extractant in a green process                                                     | Simulated                                                           | 10                                               | 99.47% after a 4 stages of a cross flow process                                                    | 274    | 0          | NR     | NR           | 100%                    | Water consumption = 7/6 of brine volume                                                           | 75 |
| <b>Liquid-liquid extraction</b>                          | A new co-extractant (NaBP <sub>h4</sub> ) to enhance Li <sup>+</sup> recovery                                | Simulated                                                           | 10                                               | 99.84% after 5 stages of a cross flow process                                                      | 80     | 0          | NR     | NR           | 87%                     | Water consumption = 6/5 of brine volume                                                           | 76 |

|                                 |                                                                                     |                                            |    |                                              |       |       |        |       |       |                                          |    |
|---------------------------------|-------------------------------------------------------------------------------------|--------------------------------------------|----|----------------------------------------------|-------|-------|--------|-------|-------|------------------------------------------|----|
| <b>Liquid-liquid extraction</b> | A mixed ternary solvent extraction system is validated with real brine              | Real brine, East Tajinar Salt Lake         | 10 | 87%                                          | 21.5  | 1.06  | NR     | NR    | 54%   | Water consumption = 9/10 of brine volume | 77 |
| <b>Liquid-liquid extraction</b> | A functionalized ionic liquid is employed to improve Li extraction efficiency       | Single or Binary mixture                   | NR | 83.3%                                        | NR    | NR    | 15/7.5 | NR    | 83.3% | Water consumption = brine volume         | 61 |
| <b>Liquid-liquid extraction</b> | A new separation process to extract lithium ions from salt lake brines is developed | Simulated                                  | 10 | 58.9%                                        | 77.88 | NR    | 1.57   | NR    | 58.9% | Water consumption = 0.2 brine volume     | 78 |
| <b>Liquid-liquid extraction</b> | Li recovery from South America salt lakes by LLE is first proposed                  | Salt lake brine from South America         | 10 | 99.6%                                        | 1.05  | 0.001 | 24.63  | 0     | 99.6% | Water consumption = 0.17 brine volume    | 79 |
| <b>Liquid-liquid extraction</b> | A novel synergistic extraction with hydrophobic deep eutectic solvents is proposed  | Simulated                                  | 5  | 95.7%                                        | NR    | NR    | 33.23  | 0     | 95.7% | Water consumption = brine volume         | 80 |
| <b>Liquid-liquid extraction</b> | A more stable and efficient extraction system is proposed                           | Real brine from West Taijinar              | NR | 96.7%                                        | 18.17 | 0     | 0.39   | 0.002 | 96.7  | Water consumption = 0.25 brine volume    | 81 |
| <b>Liquid-liquid extraction</b> | A novel application of HBTA-TOPO-kerosene extraction system is proposed             | Real, from lithium carbonate precipitation | NR | 96%                                          | 0     | 0     | 7.98   | 0.008 | 96%   | Water consumption = 0.9 brine volume     | 82 |
| <b>Liquid-liquid extraction</b> | A novel ternary synergistic solvent extraction system is proposed                   | Single or Binary mixture                   | NR | 48.4%                                        | NR    | NR    | NR     | NR    | 48.4% | Water consumption = 0.08 brine volume    | 83 |
| <b>Liquid-liquid extraction</b> | A novel fluoride-free ionic liquid is synthesized and used as co-extractant         | Simulated                                  | 10 | 99.2% after 5 stages of a cross flow process | NR    | NR    | NR     | NR    | 99%   | Water consumption = 7/24 of brine volume | 84 |

**Supplementary Table 2:** Summary of reported data for selected articles in the period 2017-2022. The selection criteria for compiled articles are: it should have been published in English, in a SCOPUS listed journal, and it should include enough experimental data to plot no less than 3 of the performance indicators plotted in Figure 4.

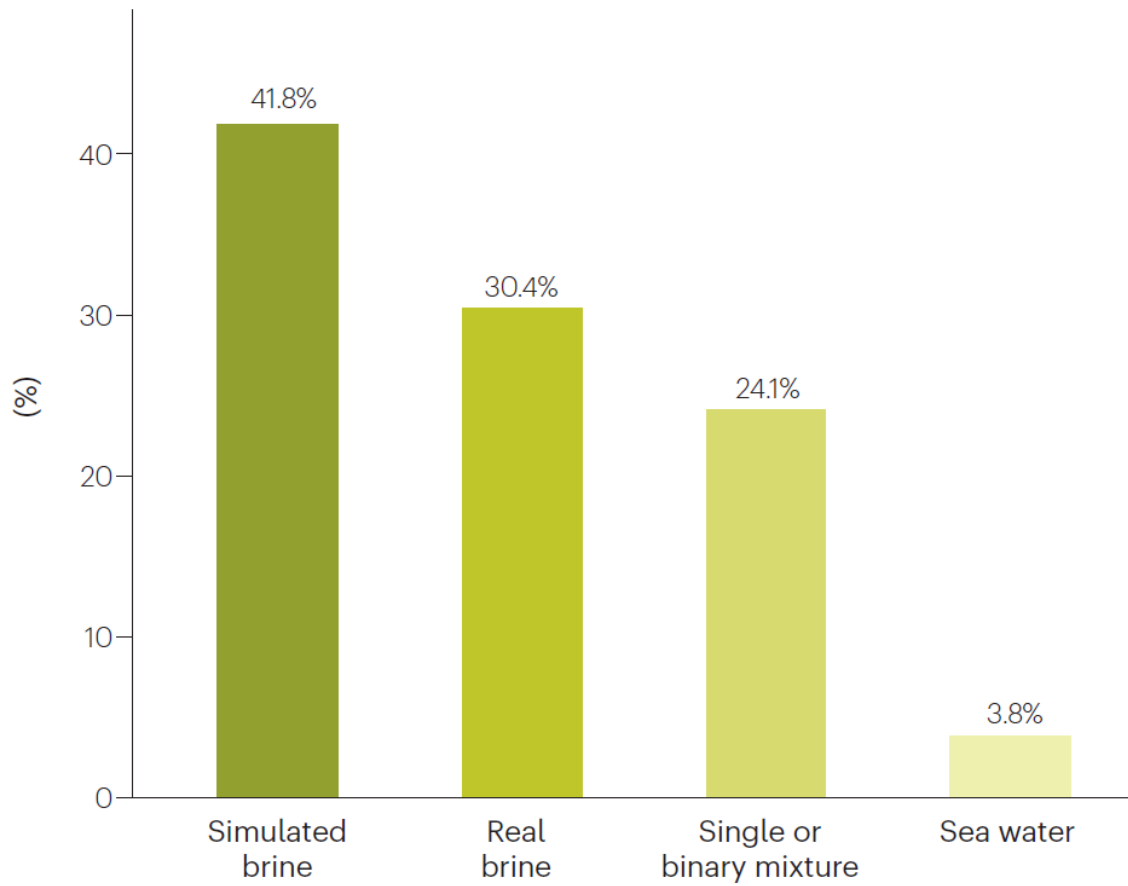

**Supplementary Figure 1:** Feed solutions used for testing the proposed DLE technologies. Compilation of different performance indicators for a selection of articles in the period 2017-2022 (analysed articles are those listed in Supplementary Table 2).

| Technology                      | Freshwater requirements (m <sup>3</sup> of water per tonne of Li <sub>2</sub> CO <sub>3</sub> ) | Final Li <sup>+</sup> concentration after DLE processing (g l <sup>-1</sup> ) | Reference |
|---------------------------------|-------------------------------------------------------------------------------------------------|-------------------------------------------------------------------------------|-----------|
| <b>Liquid-liquid extraction</b> | 0.06                                                                                            | 4.40                                                                          | 74        |
|                                 | 2591                                                                                            | 0.09                                                                          | 75        |
|                                 | 756.5                                                                                           | 0.30                                                                          | 76        |
|                                 | 0.81                                                                                            | 1.25                                                                          | 85        |
|                                 | 29.60                                                                                           | 20.92                                                                         | 77        |
|                                 | 2.11                                                                                            | 1.27                                                                          | 78        |
|                                 | 188.62                                                                                          | 20.00                                                                         | 79        |
|                                 | 1.99                                                                                            | 0.99                                                                          | 80        |
|                                 | 0.08                                                                                            | 1.18                                                                          | 81        |
|                                 | 1.12                                                                                            | 15.05                                                                         | 82        |
|                                 | 0.18                                                                                            | 8.25                                                                          | 83        |
|                                 | 60.25                                                                                           | 3.43                                                                          | 86        |
| <b>Ion Exchange resins</b>      | N/R                                                                                             | N/R                                                                           | 48        |
|                                 | N/R                                                                                             | N/R                                                                           | 49        |
|                                 | 9.09                                                                                            | 0.620                                                                         | 87        |
|                                 | 32.88                                                                                           | 0.240                                                                         | 88        |
|                                 | 2684                                                                                            | 0.014                                                                         | 89        |
|                                 | 188                                                                                             | 0.050                                                                         | 50        |
|                                 | 7994                                                                                            | 0.005                                                                         | 90        |
|                                 | 226.2                                                                                           | 0.041                                                                         | 91        |
|                                 | 8.20                                                                                            | 0.229                                                                         | 51        |
|                                 | 462                                                                                             | 0.061                                                                         | 52        |
|                                 | N/R                                                                                             | N/R                                                                           | 53        |
|                                 | 60604                                                                                           | 0.003                                                                         | 54        |
|                                 | 18787                                                                                           | 0.001                                                                         | 55        |
|                                 | 20.35                                                                                           | 0.277                                                                         | 56        |
|                                 | 18.1                                                                                            | 0.347                                                                         | 57        |
|                                 | 2.74                                                                                            | 0.342                                                                         | 58        |
|                                 | 0.11                                                                                            | 1.74                                                                          | 59        |
|                                 | N/R                                                                                             | N/R                                                                           | 60        |
| 82.4                            | 0.114                                                                                           | 61                                                                            |           |
| <b>Ion-pumping</b>              | N/R                                                                                             | N/R                                                                           | 10        |
|                                 | 229.6                                                                                           | 0.09                                                                          | 11        |
|                                 | N/R                                                                                             | 0.49                                                                          | 13        |
|                                 | N/R                                                                                             | N/R                                                                           | 12        |
|                                 | N/R                                                                                             | N/R                                                                           | 14        |
|                                 | 4169.3                                                                                          | 0.14                                                                          | 92        |
|                                 | 90.3                                                                                            | 0.21                                                                          | 93        |
|                                 | 41.4                                                                                            | 13.8                                                                          | 15        |
|                                 | 757.5                                                                                           | 0.06                                                                          | 16        |
|                                 | 2119.8                                                                                          | 0.19                                                                          | 17        |
|                                 | N/R                                                                                             | N/R                                                                           | 94        |
|                                 | N/R                                                                                             | 0.16                                                                          | 18        |
|                                 | N/R                                                                                             | N/R                                                                           | 95        |
|                                 | N/R                                                                                             | N/R                                                                           | 96        |
|                                 | 857.7                                                                                           | 0.05                                                                          | 97        |
|                                 | 773.5                                                                                           | 0.24                                                                          | 98        |
| N/R                             | 1.32                                                                                            | 99                                                                            |           |
| 137.7                           | 0.07                                                                                            | 100                                                                           |           |

**Supplementary Table 3:** Volume of freshwater spent per ton of lithium carbonate produced, and final lithium concentration achieved for selected articles in the period 2016-2023. The numbers listed in the table were in

many cases calculated from reported data in the corresponding data, and is not directly given by the original authors of the articles. NR: not reported, or not enough experimental data reported to perform calculation.

| Solubility                             | CaSO <sub>4</sub> | Na <sub>2</sub> CO <sub>3</sub> | NaHCO <sub>3</sub> | MgCO <sub>3</sub>     | K <sub>2</sub> CO <sub>3</sub> | Li <sub>2</sub> CO <sub>3</sub> | CaCO <sub>3</sub>     | NaOH | Mg(OH) <sub>2</sub>    | KOH   | LiOH | Ca(OH) <sub>2</sub>   | Ca(BO <sub>2</sub> ) <sub>2</sub> | Na <sub>2</sub> B <sub>4</sub> O <sub>7</sub> |
|----------------------------------------|-------------------|---------------------------------|--------------------|-----------------------|--------------------------------|---------------------------------|-----------------------|------|------------------------|-------|------|-----------------------|-----------------------------------|-----------------------------------------------|
| g <sub>salt</sub> /kg <sub>water</sub> | 2.05              | 307                             | 103                | 1.8                   | 1110                           | 13.0                            | 0.0066                | 1000 | 0.0069                 | 1210  | 125  | 1.6                   | 1.3                               | 31.7                                          |
| Molal                                  | 0.02              | 2.90                            | 1.23               |                       | 8.04                           | 0.18                            |                       | 25.0 |                        | 21.61 | 5.22 |                       |                                   |                                               |
| K <sub>SP</sub>                        |                   |                                 |                    | 6.82x10 <sup>-6</sup> |                                |                                 | 3.36x10 <sup>-9</sup> |      | 5.61x10 <sup>-12</sup> |       |      | 5.02x10 <sup>-6</sup> |                                   |                                               |

**Supplementary Table 4:** Solubility values in pure water at 25°C for compounds that could potentially crystallize during brine processing. First and second rows in units of g<sub>salt</sub> kg<sub>water</sub><sup>-1</sup> and molal, respectively. For compounds with low solubility values, the K<sub>SP</sub> value is listed instead of solubility value in molal units. Values taken from reference 1.

| Solubility                             | NaCl | MgCl <sub>2</sub> | KCl  | LiCl | CaCl <sub>2</sub> | Na <sub>2</sub> SO <sub>4</sub> | MgSO <sub>4</sub> | K <sub>2</sub> SO <sub>4</sub> | Li <sub>2</sub> SO <sub>4</sub> |
|----------------------------------------|------|-------------------|------|------|-------------------|---------------------------------|-------------------|--------------------------------|---------------------------------|
| g <sub>salt</sub> /kg <sub>water</sub> | 360  | 560               | 355  | 845  | 813               | 281                             | 357               | 120                            | 342                             |
| Molal                                  | 6.15 | 5.88              | 4.77 | 19.9 | 7.32              | 1.98                            | 2.97              | 0.69                           | 3.11                            |

**Supplementary Table 4** (CONTINUATION).

## Supplementary References

### THIS REFERENCE NUMBERS ARE NOT THE SAME AS IN THE MAIN MANUSCRIPT

1. Garrett, D. E. *Handbook of Lithium and Natural Calcium Chloride. Handbook of Lithium and Natural Calcium Chloride* (2004). doi:10.1016/B978-0-12-276152-2.X5035-X.
2. Franco, M. G. *et al.* Chemical and isotopic features of Li-rich brines from the Salar de Olaroz, Central Andes of NW Argentina. *J. South Am. Earth Sci.* **103**, 102742 (2020).
3. Xu, S. *et al.* Extraction of lithium from Chinese salt-lake brines by membranes: Design and practice. *J. Memb. Sci.* **635**, 119441 (2021).
4. Somrani, A., Hamzaoui, A. H. & Pontie, M. Study on lithium separation from salt lake brines by nanofiltration (NF) and low pressure reverse osmosis (LPRO). *Desalination* **317**, 184–192 (2013).
5. Stringfellow, W. T. & Dobson, P. F. Technology for the Recovery of Lithium from Geothermal Brines. *Energies* **14**, (2021).
6. Sanjuan, B. *et al.* Major geochemical characteristics of geothermal brines from the Upper Rhine Graben granitic basement with constraints on temperature and circulation. *Chem. Geol.* **428**, 27–47 (2016).
7. Setiawan, F. A., Rahayuningsih, E., Petrus, H. T. B. M., Nurpratama, M. I. & Perdana, I. Kinetics of silica precipitation in geothermal brine with seeds addition: minimizing silica scaling in a cold re-injection system. *Geotherm. Energy* **7**, 22 (2019).
8. Baspineiro, C. F., Franco, J. & Flexer, V. Potential water recovery during lithium mining from high salinity brines. *Sci. Total Environ.* **720**, 137523 (2020).
9. Du, X. *et al.* A novel electroactive  $\lambda$ -MnO<sub>2</sub>/PPy/PSS core–shell nanorod coated electrode for selective recovery of lithium ions at low concentration. *J. Mater. Chem. A* **4**, 13989–13996 (2016).
10. Liu, D.-F., Sun, S.-Y. & Yu, J.-G. A new high-efficiency process for Li<sup>+</sup> recovery from solutions based on LiMn<sub>2</sub>O<sub>4</sub>/ $\lambda$ -MnO<sub>2</sub> materials. *Chem. Eng. J.* **377**, 119825 (2019).
11. Liu, D.-F., Sun, S.-Y. & Yu, J.-G. Electrochemical and adsorption behaviour of Li<sup>+</sup>, Na<sup>+</sup>, K<sup>+</sup>, Ca<sup>2+</sup>, and Mg<sup>2+</sup> in LiMn<sub>2</sub>O<sub>4</sub>/ $\lambda$ -MnO<sub>2</sub> structures. *Can. J. Chem. Eng.* **97**, 1589–1595 (2019).
12. Wang, P. *et al.* A novel electroactive PPy/HKUST-1 composite film-coated electrode for the selective recovery of lithium ions with low concentrations in aqueous solutions. *Electrochim. Acta* **306**, 35–44 (2019).
13. Niu, J. *et al.* An electrically switched ion exchange system with self-electrical-energy recuperation for efficient and selective LiCl separation from brine lakes. *Sep. Purif. Technol.* **274**, 118995 (2021).
14. Fang, J.-W. *et al.* Establishment of PPy-derived carbon encapsulated LiMn<sub>2</sub>O<sub>4</sub> film electrode and its performance for efficient Li<sup>+</sup> electrosorption. *Sep. Purif. Technol.* **280**, 119726 (2022).
15. Romero, V. C. E., Putrino, D. S., Tagliacuzzi, M., Flexer, V. & Calvo, E. J. Sustainable Electrochemical Extraction of Lithium from Natural Brine: Part II. Flow Reactor. *J. Electrochem. Soc.* **168**, 020518 (2021).
16. Romero, V. C. E., Llano, K. & Calvo, E. J. Electrochemical extraction of lithium by ion



- insertion from natural brine using a flow-by reactor: Possibilities and limitations. *Electrochem. commun.* **125**, 106980 (2021).
17. Kim, N., Su, X. & Kim, C. Electrochemical lithium recovery system through the simultaneous lithium enrichment via sustainable redox reaction. *Chem. Eng. J.* **420**, 127715 (2021).
  18. Yuan, Z. *et al.* Thermo-osmosis-Coupled Thermally Regenerative Electrochemical Cycle for Efficient Lithium Extraction. *ACS Appl. Mater. Interfaces* **13**, 6276–6285 (2021).
  19. Liu, G., Zhao, Z. & He, L. Highly selective lithium recovery from high Mg/Li ratio brines. *Desalination* **474**, 114185 (2020).
  20. Diaz Nieto, C. H., Rabaey, K. & Flexer, V. Membrane electrolysis for the removal of Na<sup>+</sup> from brines for the subsequent recovery of lithium salts. *Sep. Purif. Technol.* **252**, 117410 (2020).
  21. Díaz Nieto, C. H. *et al.* Membrane electrolysis for the removal of Mg<sup>2+</sup> and Ca<sup>2+</sup> from lithium rich brines. *Water Res.* **154**, 117–124 (2019).
  22. Torres, W. R., Díaz Nieto, C. H., PrévotEAU, A., Rabaey, K. & Flexer, V. Lithium carbonate recovery from brines using membrane electrolysis. *J. Memb. Sci.* **615**, 118416 (2020).
  23. Yang, S., Zhang, F., Ding, H., He, P. & Zhou, H. Lithium metal extraction from seawater. *Joule* **2**, 1648–1651 (2018).
  24. Guo, Z.-Y. *et al.* Prefractionation of LiCl from concentrated seawater/salt lake brines by electrodialysis with monovalent selective ion exchange membranes. *J. Clean. Prod.* **193**, 338–350 (2018).
  25. Nie, X.-Y., Sun, S.-Y., Sun, Z., Song, X. & Yu, J.-G. Ion-fractionation of lithium ions from magnesium ions by electrodialysis using monovalent selective ion-exchange membranes. *Desalination* **403**, 128–135 (2017).
  26. Ji, Z. *et al.* Preliminary study on recovering lithium from high Mg<sup>2+</sup>/Li<sup>+</sup> ratio brines by electrodialysis. *Sep. Purif. Technol.* **172**, 168–177 (2017).
  27. Tian, H. *et al.* Effect of process conditions on generation of hydrochloric acid and lithium hydroxide from simulated lithium chloride solution using bipolar membrane electrodialysis. *SN Appl. Sci.* **4**, 47 (2022).
  28. González, A. *et al.* Application and Analysis of Bipolar Membrane Electrodialysis for LiOH Production at High Electrolyte Concentrations: Current Scope and Challenges. *Membranes (Basel)*. **11**, 575 (2021).
  29. Jiang, C., Wang, Y., Wang, Q., Feng, H. & Xu, T. Production of lithium hydroxide from lake brines through electro-electrodialysis with bipolar membranes (EEDBM). *Ind. Eng. Chem. Res.* **53**, 6103–6112 (2014).
  30. Hwang, C. W. *et al.* Process design for lithium recovery using bipolar membrane electrodialysis system. *Sep. Purif. Technol.* **166**, 34–40 (2016).
  31. Ji, P.-Y. *et al.* Effect of coexisting ions on recovering lithium from high Mg<sup>2+</sup>/Li<sup>+</sup> ratio brines by selective-electrodialysis. *Sep. Purif. Technol.* **207**, 1–11 (2018).
  32. Nie, X.-Y., Sun, S.-Y., Song, X. & Yu, J.-G. Further investigation into lithium recovery from salt lake brines with different feed characteristics by electrodialysis. *J. Memb. Sci.* **530**, 185–191 (2017).
  33. Jarma, Y. A., Çermikli, E., İpekçi, D., Altıok, E. & Kabay, N. Comparison of two

- electrodialysis stacks having different ion exchange and bipolar membranes for simultaneous separation of boron and lithium from aqueous solution. *Desalination* **500**, 114850 (2021).
34. Yu, C. *et al.* Bio-inspired fabrication of Ester-functionalized imprinted composite membrane for rapid and high-efficient recovery of lithium ion from seawater. *J. Colloid Interface Sci.* **572**, 340–353 (2020).
  35. Lu, J. *et al.* Multilayered ion-imprinted membranes with high selectivity towards Li<sup>+</sup> based on the synergistic effect of 12-crown-4 and polyether sulfone. *Appl. Surf. Sci.* **427**, 931–941 (2018).
  36. Shi, W. *et al.* Efficient lithium extraction by membrane capacitive deionization incorporated with monovalent selective cation exchange membrane. *Sep. Purif. Technol.* **210**, 885–890 (2019).
  37. Ryu, T. *et al.* Lithium recovery system using electrostatic field assistance. *Hydrometallurgy* **151**, 78–83 (2015).
  38. Lee, D.-H. *et al.* Selective lithium recovery from aqueous solution using a modified membrane capacitive deionization system. *Hydrometallurgy* **173**, 283–288 (2017).
  39. Sun, Y., Wang, Y., Liu, Y. & Xiang, X. Highly Efficient Lithium Extraction from Brine with a High Sodium Content by Adsorption-Coupled Electrochemical Technology. *ACS Sustain. Chem. Eng.* **9**, 11022–11031 (2021).
  40. Li, W. *et al.* A positively charged composite nanofiltration membrane modified by EDTA for LiCl/MgCl<sub>2</sub> separation. *Sep. Purif. Technol.* **186**, 233–242 (2017).
  41. Li, Y., Zhao, Y. J., Wang, H. & Wang, M. The application of nanofiltration membrane for recovering lithium from salt lake brine. *Desalination* **468**, 114081 (2019).
  42. He, R. *et al.* Unprecedented Mg<sup>2+</sup>/Li<sup>+</sup> separation using layer-by-layer based nanofiltration hollow fiber membranes. *Desalination* **525**, 115492 (2022).
  43. Li, Q. *et al.* Efficiently rejecting and concentrating Li<sup>+</sup> by nanofiltration membrane under a reversed electric field. *Desalination* **535**, 115825 (2022).
  44. Oyarce, E., Roa, K., Boulett, A., Salazar-Marconi, P. & Sánchez, J. Removal of lithium ions from aqueous solutions by an ultrafiltration membrane coupled to soluble functional polymer. *Sep. Purif. Technol.* **288**, 120715 (2022).
  45. Bi, Q., Zhang, C., Liu, J., Liu, X. & Xu, S. Positively charged zwitterion-carbon nitride functionalized nanofiltration membranes with excellent separation performance of Mg<sup>2+</sup>/Li<sup>+</sup> and good antifouling properties. *Sep. Purif. Technol.* **257**, 117959 (2021).
  46. Park, S. H. *et al.* Lithium recovery from artificial brine using energy-efficient membrane distillation and nanofiltration. *J. Memb. Sci.* **598**, 117683 (2020).
  47. Zhao, Y., Wang, H., Li, Y., Wang, M. & Xiang, X. An integrated membrane process for preparation of lithium hydroxide from high Mg/Li ratio salt lake brine. *Desalination* **493**, 114620 (2020).
  48. Wei, S., Wei, Y., Chen, T., Liu, C. & Tang, Y. Porous lithium ion sieves nanofibers: General synthesis strategy and highly selective recovery of lithium from brine water. *Chem. Eng. J.* **379**, 122407 (2020).
  49. Zhu, X. *et al.* Study on adsorption extraction process of lithium ion from West Taijinar brine by shaped titanium-based lithium ion sieves. *Sep. Purif. Technol.* **274**, 119099 (2021).

50. Zhang, G. *et al.* Synthesis of aluminum-doped ion-sieve manganese oxides powders with enhanced adsorption performance. *Colloids Surfaces A Physicochem. Eng. Asp.* **583**, 123950 (2019).
51. Zhao, K. *et al.* Synthesis of porous fiber-supported lithium ion-sieve adsorbent for lithium recovery from geothermal water. *Chem. Eng. J.* **430**, 131423 (2022).
52. Zhang, Y., Liu, J., Yang, Y., Lin, S. & Li, P. Preparation of granular titanium-type lithium-ion sieves and recyclability assessment for lithium recovery from brines with different pH value. *Sep. Purif. Technol.* **267**, 118613 (2021).
53. Li, H. *et al.* Prelithiation-derived hierarchical TiO<sub>2</sub> sieve with metal-organic framework gate for selective lithium recovery. *Chem. Eng. J.* **451**, 138662 (2023).
54. Xue, F. *et al.* Preparation and evaluation of  $\alpha$ -Al<sub>2</sub>O<sub>3</sub> supported lithium ion sieve membranes for Li<sup>+</sup> extraction. *Chinese J. Chem. Eng.* **28**, 2312–2318 (2020).
55. Wang, J. *et al.* Hierarchically Porous Polyacrylonitrile (PAN) 3D Architectures with Anchored Lattice-Expanded  $\lambda$ -MnO<sub>2</sub> Nanodots as Freestanding Adsorbents for Superior Lithium Separation. *Ind. Eng. Chem. Res.* **59**, 13239–13245 (2020).
56. Cao, G. *et al.* Synthesis, Adsorption Properties and Stability of Cr-Doped Lithium Ion Sieve in Salt Lake Brine. *Bull. Chem. Soc. Jpn.* **92**, 1205–1210 (2019).
57. Xue, F. *et al.* Fe<sub>3</sub>O<sub>4</sub>-doped lithium ion-sieves for lithium adsorption and magnetic separation. *Sep. Purif. Technol.* **228**, 115750 (2019).
58. Li, X. *et al.* Taming wettability of lithium ion sieve via different TiO<sub>2</sub> precursors for effective Li recovery from aqueous lithium resources. *Chem. Eng. J.* **392**, 123731 (2020).
59. Lin, H. *et al.* Synthesis of Polyporous Ion-Sieve and Its Application for Selective Recovery of Lithium from Geothermal Water. *ACS Appl. Mater. Interfaces* **11**, 26364–26372 (2019).
60. Li, X. *et al.* Highly selective separation of lithium with hierarchical porous lithium-ion sieve microsphere derived from MXene. *Desalination* **537**, 115847 (2022).
61. Ding, W. *et al.* Synthesis of granulated H<sub>4</sub>Mn<sub>5</sub>O<sub>12</sub>/chitosan with improved stability by a novel cross-linking strategy for lithium adsorption from aqueous solutions. *Chem. Eng. J.* **426**, 131689 (2021).
62. Lai, X., Xiong, P. & Zhong, H. Extraction of lithium from brines with high Mg/Li ratio by the crystallization-precipitation method. *Hydrometallurgy* **192**, 105252 (2020).
63. Liu, D., Li, Z., He, L. & Zhao, Z. Facet engineered Li<sub>3</sub>PO<sub>4</sub> for lithium recovery from brines. *Desalination* **514**, 115186 (2021).
64. Alsabbagh, A., Aljarrah, S. & Almahasneh, M. Lithium enrichment optimization from Dead Sea end brine by chemical precipitation technique. *Miner. Eng.* **170**, 107038 (2021).
65. Quintero, C. *et al.* Development of a co-precipitation process for the preparation of magnesium hydroxide containing lithium carbonate from Li-enriched brines. *Hydrometallurgy* **198**, 105515 (2020).
66. Liu, D., Zhao, Z., Xu, W., Xiong, J. & He, L. A closed-loop process for selective lithium recovery from brines via electrochemical and precipitation. *Desalination* **519**, 115302 (2021).
67. Yu, X., Fan, X., Guo, Y. & Deng, T. Recovery of lithium from underground brine by

- multistage centrifugal extraction using tri-isobutyl phosphate. *Sep. Purif. Technol.* **211**, 790–798 (2019).
68. Pérez-Rodríguez, S., Milton, J. A. & Garcia-Araez, N. Novel Method of Lithium Production from Brines Combining a Battery Material and Sodium Sulfite as a Cheap and Environmentally Friendly Reducing Agent. *ACS Sustain. Chem. Eng.* **8**, 6243–6251 (2020).
  69. Xiong, J., Zhao, Z., Liu, D. & He, L. Direct lithium extraction from raw brine by chemical redox method with LiFePO<sub>4</sub>/FePO<sub>4</sub> materials. *Sep. Purif. Technol.* **290**, 120789 (2022).
  70. Palagonia, M. S., Brogioli, D. & La Mantia, F. Lithium recovery from diluted brine by means of electrochemical ion exchange in a flow-through-electrodes cell. *Desalination* **475**, (2020).
  71. Joo, H. *et al.* Pilot-scale demonstration of an electrochemical system for lithium recovery from the desalination concentrate. *Environ. Sci. Water Res. Technol.* **6**, 290–295 (2020).
  72. Xu, L. *et al.* Stable ionic liquid-based polymer inclusion membranes for lithium and magnesium separation. *Sep. Purif. Technol.* **288**, 120626 (2022).
  73. Zhang, Y., Xu, R., Sun, W., Wang, L. & Tang, H. Li extraction from model brine via electrocoagulation: Processing, kinetics, and mechanism. *Sep. Purif. Technol.* **250**, 117234 (2020).
  74. Bai, R., Wang, J., Wang, D., Zhang, Y. & Cui, J. Selective separation of lithium from the high magnesium brine by the extraction system containing phosphate-based ionic liquids. *Sep. Purif. Technol.* **274**, 119051 (2021).
  75. Li, R. *et al.* Novel ionic liquid as co-extractant for selective extraction of lithium ions from salt lake brines with high Mg/Li ratio. *Sep. Purif. Technol.* **277**, 119471 (2021).
  76. Ren, Z. *et al.* Highly selective extraction of lithium ions from salt lake brines with sodium tetrphenylborate as co-extractant. *Sep. Purif. Technol.* **269**, 118756 (2021).
  77. Su, H. *et al.* Recovery of lithium from salt lake brine using a mixed ternary solvent extraction system consisting of TBP, FeCl<sub>3</sub> and P507. *Hydrometallurgy* **197**, 105487 (2020).
  78. Zhou, Z. *et al.* Recovery of lithium from salt-lake brines using solvent extraction with TBP as extractant and FeCl<sub>3</sub> as co-extraction agent. *Hydrometallurgy* **191**, 105244 (2020).
  79. Zhang, L. *et al.* Recovery of lithium from salt lake brine with high Na/Li ratio using solvent extraction. *J. Mol. Liq.* **362**, 119667 (2022).
  80. Hanada, T. & Goto, M. Synergistic Deep Eutectic Solvents for Lithium Extraction. *ACS Sustain. Chem. Eng.* **9**, 2152–2160 (2021).
  81. Ji, L. *et al.* Mechanism and process for the extraction of lithium from the high magnesium brine with N,N-bis(2-ethylhexyl)-2-methoxyacetamide in kerosene and FeCl<sub>3</sub>. *J. Ind. Eng. Chem.* **113**, 254–263 (2022).
  82. Zhang, L. *et al.* Recovery of lithium from alkaline brine by solvent extraction with β-diketone. *Hydrometallurgy* **175**, 35–42 (2018).
  83. Su, H. *et al.* Combining Selective Extraction and Easy Stripping of Lithium Using a Ternary Synergistic Solvent Extraction System through Regulation of Fe<sup>3+</sup> Coordination. *ACS Sustain. Chem. Eng.* **8**, 1971–1979 (2020).

84. Wang, Y. *et al.* Recovery of lithium ions from salt lake brine with a high magnesium/lithium ratio using heteropolyacid ionic liquid. *ACS Sustain. Chem. Eng.* **7**, 3062–3072 (2018).
85. Yang, S., Liu, G., Wang, J., Cui, L. & Chen, Y. Recovery of lithium from alkaline brine by solvent extraction with functionalized ionic liquid. *Fluid Phase Equilib.* **493**, 129–136 (2019).
86. Xiang, W., Liang, S., Zhou, Z., Qin, W. & Fei, W. Extraction of lithium from salt lake brine containing borate anion and high concentration of magnesium. *Hydrometallurgy* **166**, 9–15 (2016).
87. Luo, Q. *et al.* Extraction of lithium from salt lake brines by granulated adsorbents. *Colloids Surfaces A Physicochem. Eng. Asp.* **628**, 127256 (2021).
88. Zhong, J., Lin, S. & Yu, J. Li<sup>+</sup> adsorption performance and mechanism using lithium/aluminum layered double hydroxides in low grade brines. *Desalination* **505**, 114983 (2021).
89. Marthi, R. & Smith, Y. R. Application and limitations of a H<sub>2</sub>TiO<sub>3</sub> – Diatomaceous earth composite synthesized from titania slag as a selective lithium adsorbent. *Sep. Purif. Technol.* **254**, 117580 (2021).
90. Marthi, R. & Smith, Y. R. Selective recovery of lithium from the Great Salt Lake using lithium manganese oxide-diatomaceous earth composite. *Hydrometallurgy* **186**, 115–125 (2019).
91. Meng, Z. *et al.* Highly flexible interconnected Li<sup>+</sup> ion-sieve porous hydrogels with self-regulating nanonetwork structure for marine lithium recovery. *Chem. Eng. J.* **445**, 136780 (2022).
92. Romero, V. C. E., Tagliacruzchi, M., Flexer, V. & Calvo, E. J. Sustainable electrochemical extraction of lithium from natural brine for renewable energy storage. *J. Electrochem. Soc.* **165**, A2294–A2302 (2018).
93. Romero, V. C. E., Putrino, D. S., Tagliacruzchi, M., Flexer, V. & Calvo, E. J. Electrochemical Flow Reactor for Selective Extraction of Lithium Chloride from Natural Brines. *J. Electrochem. Soc.* **167**, 120522 (2020).
94. Wang, L. *et al.* Electrochemical lithium recovery with lithium iron phosphate: what causes performance degradation and how can we improve the stability? *Sustain. Energy Fuels* **5**, 3124–3133 (2021).
95. Fu, L. *et al.* Electrochemical ion-pumping-assisted transfer system featuring a heterogeneous membrane for lithium recovery. *Chem. Eng. J.* **435**, 134955 (2022).
96. Zhang, Z. *et al.* A scalable three-dimensional porous λ-MnO<sub>2</sub>/rGO/Ca-alginate composite electroactive film with potential-responsive ion-pumping effect for selective recovery of lithium ions. *Sep. Purif. Technol.* **259**, 118111 (2021).
97. Luo, G. *et al.* Electrochemical lithium ions pump for lithium recovery from brine by using a surface stability Al<sub>2</sub>O<sub>3</sub>–ZrO<sub>2</sub> coated LiMn<sub>2</sub>O<sub>4</sub> electrode. *J. Energy Chem.* **69**, 244–252 (2022).
98. Zhao, X., Zheng, L., Hou, Y., Wang, Y. & Zhu, L. Pulsed electric field controlled lithium extraction process by LMO/MXene composite electrode from brines. *Chem. Eng. J.* **450**, 138454 (2022).
99. Kim, S., Joo, H., Moon, T., Kim, S.-H. & Yoon, J. Rapid and selective lithium recovery from desalination brine using an electrochemical system. *Environ. Sci. Process. Impacts*

- 21**, 667–676 (2019).
100. Zhao, X., Yang, H., Wang, Y., Yang, L. & Zhu, L. Lithium extraction from brine by an asymmetric hybrid capacitor composed of heterostructured lithium-rich cathode and nano-bismuth anode. *Sep. Purif. Technol.* **274**, 119078 (2021).
